# Supplementary material
Source: PubMed Central journal article supplement (PMC5403140)
Supplement: NIHMS851964-supplement.pdf [file NIHMS851964-supplement.pdf]

**SUPPLEMENTARY TABLE S1: Cortical thickness change per Gy (whole-brain linear mixed-effects model)**

| <b>Region</b>                     | <b>Thickness change (<math>\mu\text{m}/\text{Gy}</math>)</b> | <b>Standard error</b> | <b><i>p</i>-value <sup>a</sup></b> |
|-----------------------------------|--------------------------------------------------------------|-----------------------|------------------------------------|
| Banks of Superior Temporal Sulcus | -2.1                                                         | 0.7                   | 0.00217                            |
| Caudal Anterior Cingulate         | -1.6                                                         | 0.6                   | 0.00972                            |
| Caudal Middle Frontal             | -0.9                                                         | 0.7                   | 0.16630                            |
| Cuneus                            | -0.6                                                         | 0.8                   | 0.42719                            |
| Entorhinal                        | -4.8                                                         | 1.1                   | 0.00001                            |
| Frontal Pole                      | -0.3                                                         | 1.0                   | 0.76862                            |
| Fusiform                          | -2.6                                                         | 1.0                   | 0.00715                            |
| Inferior Parietal                 | -2.3                                                         | 0.7                   | 0.00201                            |
| Inferior Temporal                 | -3.9                                                         | 1.0                   | 0.00011                            |
| Insula                            | -1.7                                                         | 0.7                   | 0.01067                            |
| Isthmus Cingulate                 | -1.8                                                         | 0.5                   | 0.00093                            |
| Lateral Occipital                 | -1.6                                                         | 1.0                   | 0.12375                            |
| Lateral Orbitofrontal             | -0.8                                                         | 0.8                   | 0.30196                            |
| Lingual                           | -1.7                                                         | 0.8                   | 0.02638                            |
| Medial Orbitofrontal              | 0.0                                                          | 0.8                   | 0.96223                            |
| Middle Temporal                   | -3.0                                                         | 0.9                   | 0.00072                            |
| Paracentral                       | -0.5                                                         | 0.6                   | 0.38834                            |
| Parahippocampal                   | -3.4                                                         | 0.9                   | 0.00018                            |
| Pars Opercularis                  | -0.7                                                         | 0.7                   | 0.28281                            |
| Pars Orbitalis                    | -2.1                                                         | 0.8                   | 0.00553                            |
| Pars Triangularis                 | -1.4                                                         | 0.7                   | 0.04584                            |
| Pericalcarine                     | -0.5                                                         | 0.8                   | 0.52777                            |
| Postcentral                       | -1.1                                                         | 0.7                   | 0.11940                            |
| Posterior Cingulate               | -0.2                                                         | 0.5                   | 0.76357                            |
| Precentral                        | -1.7                                                         | 0.7                   | 0.01498                            |
| Precuneus                         | -0.9                                                         | 0.6                   | 0.15110                            |
| Rostral Anterior Cingulate        | -1.1                                                         | 0.6                   | 0.08437                            |
| Rostral Middle Frontal            | -1.9                                                         | 0.8                   | 0.01242                            |
| Superior Frontal                  | -2.5                                                         | 0.7                   | 0.00040                            |
| Superior Parietal                 | -1.0                                                         | 0.8                   | 0.17756                            |
| Superior Temporal                 | -4.4                                                         | 0.7                   | 0.00000                            |
| Supramarginal                     | -2.1                                                         | 0.7                   | 0.00366                            |
| Temporal Pole                     | -6.5                                                         | 1.0                   | 0.00000                            |
| Transverse Temporal               | -1.5                                                         | 0.7                   | 0.02579                            |

<sup>a</sup>Univariate, two-sided, *p*-value from linear mixed-effects model without correction for multiple comparisons.

**SUPPLEMENTARY TABLE S2: Distribution of thickness change and dose by region**

| region                   | patients | observations | Mean cortical thickness change (mm) |           |        |          |      | Mean dose (Gy) |           |        |          |      |
|--------------------------|----------|--------------|-------------------------------------|-----------|--------|----------|------|----------------|-----------|--------|----------|------|
|                          |          |              | min                                 | low_quart | median | up_quart | max  | min            | low_quart | median | up_quart | max  |
| bankssts                 | 54       | 97           | -0.76                               | -0.10     | -0.04  | 0.02     | 0.29 | 0.0            | 5.4       | 16.6   | 31.3     | 63.4 |
| caudalanteriorcingulate  | 51       | 97           | -0.87                               | -0.15     | -0.06  | 0.10     | 0.33 | 0.2            | 9.9       | 21.1   | 36.5     | 60.1 |
| caudalmiddlefrontal      | 54       | 103          | -0.76                               | -0.07     | 0.00   | 0.08     | 0.37 | 0.2            | 4.9       | 16.6   | 27.4     | 62.2 |
| cuneus                   | 54       | 105          | -0.42                               | -0.08     | 0.00   | 0.08     | 0.39 | 0.0            | 5.0       | 15.8   | 27.5     | 60.2 |
| entorhinal               | 54       | 92           | -1.16                               | -0.19     | 0.00   | 0.23     | 1.25 | 0.2            | 1.6       | 7.7    | 16.4     | 58.9 |
| frontalpole              | 53       | 103          | -0.84                               | -0.19     | 0.03   | 0.22     | 0.87 | 0.2            | 3.1       | 7.6    | 19.9     | 53.9 |
| fusiform                 | 54       | 102          | -0.50                               | -0.13     | -0.06  | 0.04     | 0.46 | 0.0            | 1.9       | 10.0   | 19.0     | 54.9 |
| inferiorparietal         | 54       | 105          | -0.37                               | -0.12     | -0.02  | 0.05     | 0.28 | 0.0            | 6.3       | 14.9   | 26.8     | 61.0 |
| inferiortemporal         | 54       | 100          | -0.91                               | -0.13     | -0.04  | 0.06     | 0.49 | 0.1            | 2.0       | 8.7    | 15.7     | 58.6 |
| insula                   | 54       | 98           | -1.24                               | -0.09     | 0.00   | 0.08     | 0.52 | 0.3            | 8.6       | 19.7   | 36.1     | 61.3 |
| isthmuscingulate         | 54       | 107          | -0.55                               | -0.14     | -0.01  | 0.06     | 0.42 | 0.0            | 11.9      | 28.0   | 44.0     | 61.9 |
| lateraloccipital         | 54       | 105          | -0.45                               | -0.08     | -0.01  | 0.06     | 0.37 | 0.0            | 2.0       | 7.6    | 17.2     | 58.5 |
| lateralorbitofrontal     | 54       | 104          | -0.49                               | -0.10     | 0.01   | 0.11     | 0.39 | 0.6            | 4.7       | 12.6   | 26.8     | 60.5 |
| lingual                  | 54       | 103          | -0.58                               | -0.10     | -0.01  | 0.06     | 0.31 | 0.0            | 3.1       | 13.0   | 29.5     | 57.5 |
| medialorbitofrontal      | 53       | 104          | -0.33                               | -0.09     | -0.01  | 0.09     | 0.41 | 0.6            | 5.5       | 11.9   | 25.3     | 61.3 |
| middletemporal           | 54       | 100          | -0.83                               | -0.13     | -0.04  | 0.09     | 0.40 | 0.0            | 3.6       | 13.2   | 20.0     | 55.2 |
| paracentral              | 54       | 106          | -0.76                               | -0.08     | 0.01   | 0.09     | 0.47 | 0.0            | 5.5       | 18.8   | 35.8     | 59.6 |
| parahippocampal          | 54       | 92           | -0.55                               | -0.16     | -0.05  | 0.06     | 0.45 | 0.0            | 2.6       | 14.0   | 24.1     | 61.6 |
| parsopercularis          | 54       | 101          | -0.27                               | -0.09     | 0.00   | 0.10     | 0.30 | 0.3            | 8.3       | 18.2   | 32.7     | 65.6 |
| parsorbitalis            | 54       | 107          | -1.14                               | -0.20     | -0.02  | 0.15     | 0.60 | 0.4            | 4.6       | 12.3   | 27.8     | 61.7 |
| parstriangularis         | 54       | 103          | -0.46                               | -0.10     | -0.02  | 0.06     | 0.37 | 0.3            | 6.8       | 16.6   | 28.6     | 65.4 |
| pericalcarine            | 54       | 104          | -0.33                               | -0.08     | -0.01  | 0.08     | 0.60 | 0.0            | 3.7       | 10.8   | 25.0     | 60.8 |
| postcentral              | 54       | 105          | -0.99                               | -0.07     | -0.01  | 0.06     | 0.44 | 0.0            | 8.7       | 17.0   | 28.9     | 61.8 |
| posteriorcingulate       | 53       | 102          | -0.47                               | -0.08     | 0.00   | 0.08     | 0.32 | 0.3            | 12.6      | 27.4   | 43.0     | 61.8 |
| precentral               | 54       | 105          | -0.61                               | -0.10     | -0.02  | 0.04     | 0.48 | 0.0            | 7.6       | 16.2   | 32.6     | 61.0 |
| precuneus                | 54       | 105          | -0.37                               | -0.07     | -0.01  | 0.06     | 0.26 | 0.0            | 8.3       | 18.3   | 34.9     | 59.5 |
| rostralanteriorcingulate | 52       | 102          | -0.73                               | -0.15     | -0.05  | 0.09     | 0.57 | 0.4            | 9.1       | 16.1   | 33.1     | 60.3 |
| rostralmiddlefrontal     | 54       | 108          | -0.46                               | -0.14     | -0.02  | 0.04     | 0.34 | 0.2            | 6.3       | 14.0   | 25.7     | 59.3 |
| superiorfrontal          | 54       | 107          | -0.59                               | -0.13     | -0.03  | 0.06     | 0.33 | 0.2            | 5.8       | 15.6   | 31.6     | 58.5 |
| superiorparietal         | 54       | 106          | -0.36                               | -0.06     | 0.01   | 0.06     | 0.25 | 0.0            | 5.8       | 13.9   | 26.1     | 59.4 |
| superiortemporal         | 54       | 97           | -1.06                               | -0.13     | -0.04  | 0.06     | 0.40 | 0.1            | 5.7       | 15.8   | 28.7     | 61.8 |
| supramarginal            | 54       | 99           | -0.62                               | -0.09     | -0.03  | 0.03     | 0.41 | 0.0            | 7.6       | 16.2   | 31.1     | 62.2 |
| temporalpole             | 54       | 92           | -1.11                               | -0.30     | -0.04  | 0.28     | 1.64 | 0.3            | 1.6       | 6.7    | 20.1     | 60.8 |
| transversetemporal       | 54       | 90           | -0.60                               | -0.13     | 0.01   | 0.09     | 0.37 | 0.0            | 7.3       | 19.2   | 33.6     | 65.0 |

min = minimum; low\_quart = lower quartile (i.e., 25<sup>th</sup> %ile); up\_quart = upper quartile.

## SUPPLEMENTARY FIGURE S1: Segmentation and masking

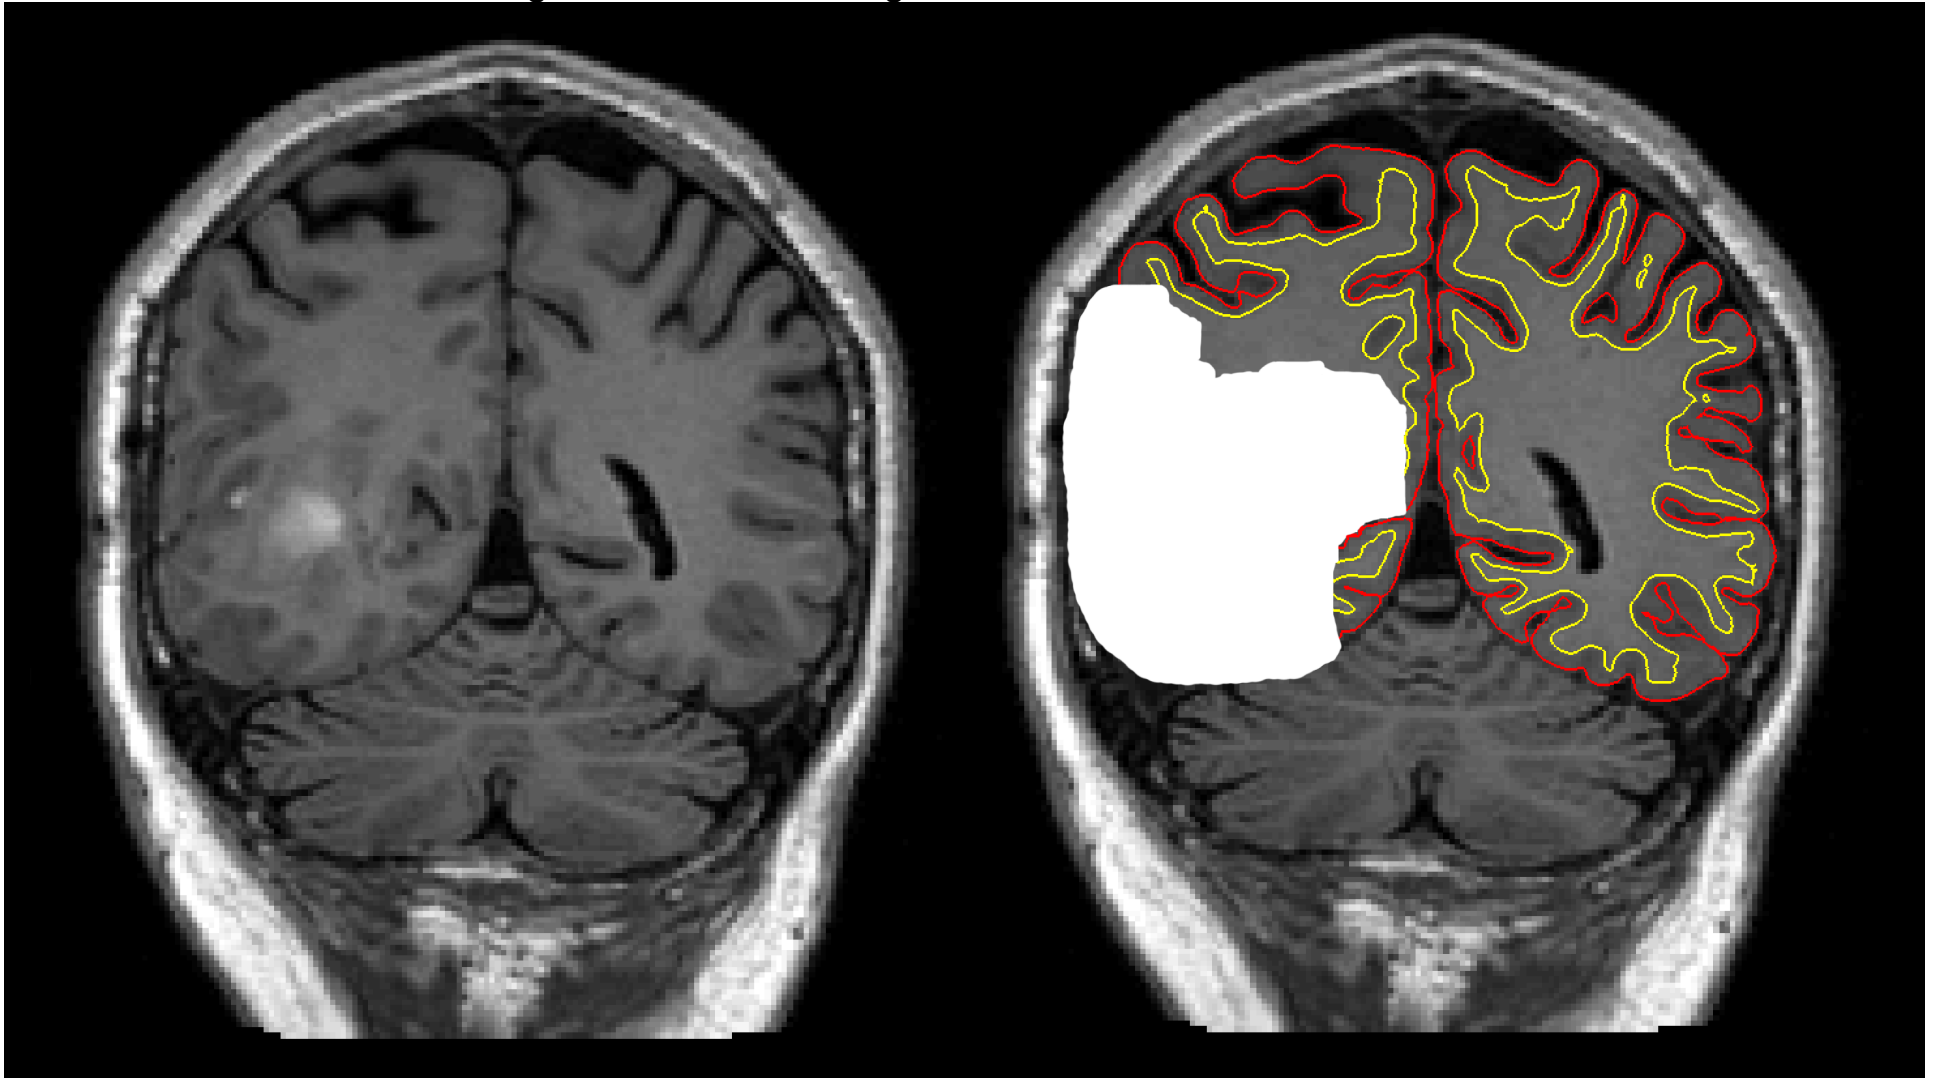

Example images demonstrating segmentation of cortex without (left panel) and with annotations (right panel). This patient is a 62-year-old man with right occipital GBM, and the MRI study shown occurred approximately 4 weeks after sub-total resection and 4 days before start of RT. Both panels show the same coronal slice from T<sub>1</sub>-weighted MRI volume without contrast. The gray matter-CSF junction is denoted in red, and the gray matter-white matter junction is denoted in yellow. The portion of the slice excluded from analysis is shown in white.

## SUPPLEMENTARY FIGURE S2: Cortex parcellation and masking

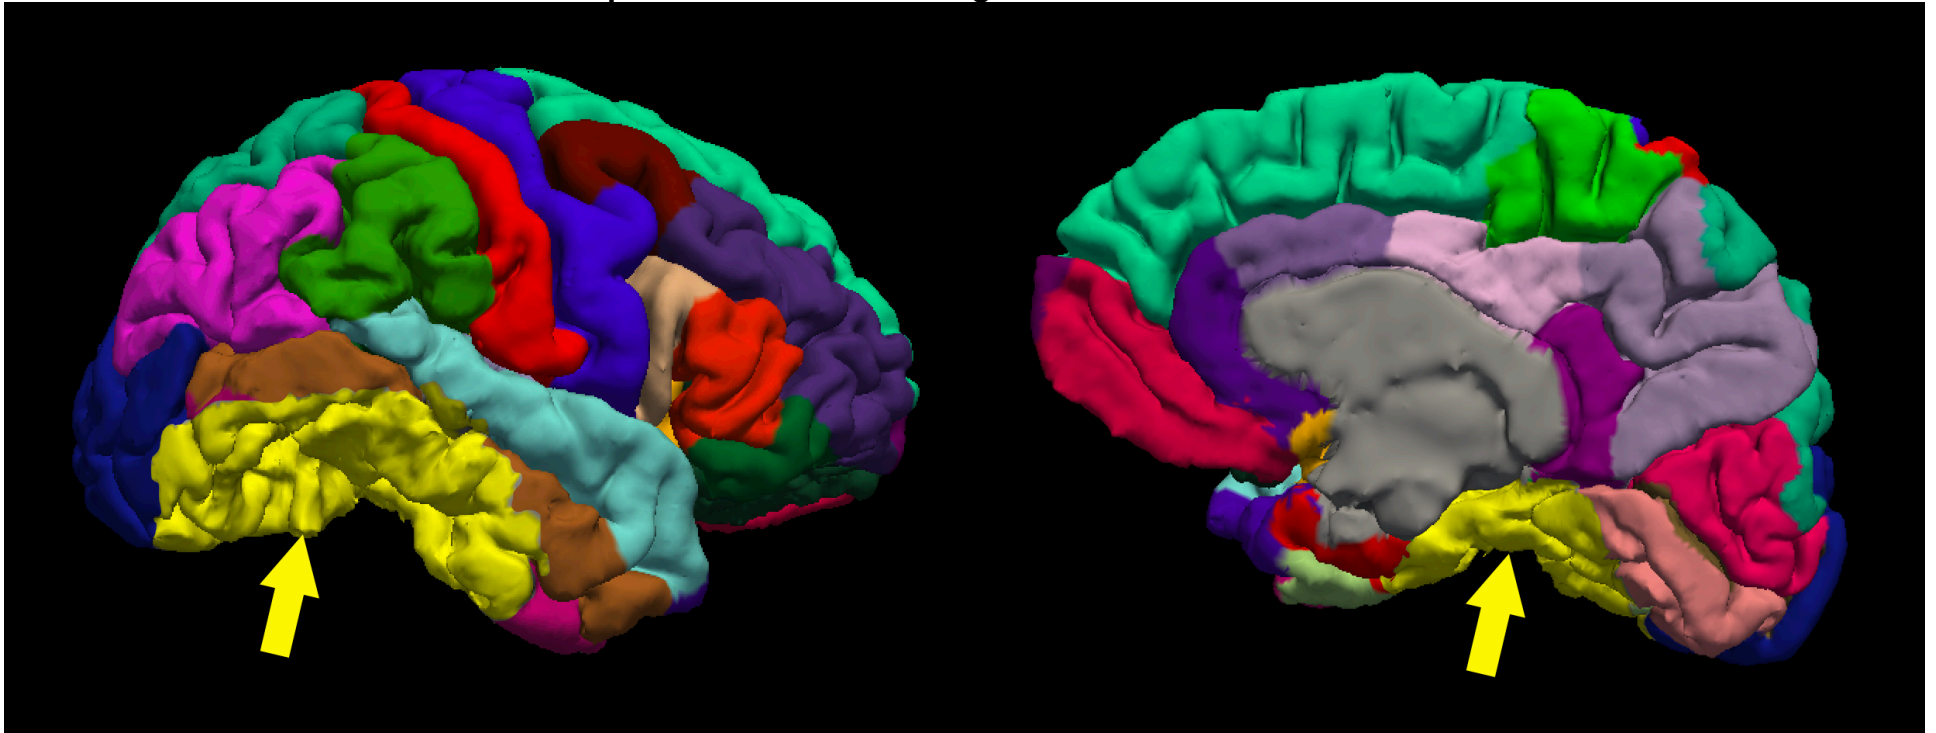

Example demonstrating parcellation of cortex into regions on the lateral (left panel) and medial (right panel) brain surfaces. This patient is a 60-year-old woman with right temporal GBM, and the MRI study shown occurred approximately 5 weeks after gross-total resection and 5 days before start of RT. The regions here use the same color code as in Figure 1A, except regions near tumor cavity that were excluded from analysis are overlaid in yellow (see yellow arrows).
